# Supplementary material
Source: PubMed Central journal article supplement (PMC5863576)
Supplement: NIHMS930134-supplement-appendix_table_4.pdf [file NIHMS930134-supplement-appendix_table_4.pdf]

**Supplemental Table 4***Odds Ratios from Logistic Regression Models Predicting Not Sleeping Recommended Amount for Age among Children, Geographic**Research on Wellbeing Study, 2012-2013, N=2,720.*

|                                                                           | Fully Adjusted Models |              |
|---------------------------------------------------------------------------|-----------------------|--------------|
|                                                                           | O.R.                  | (95% CI)     |
| <b><u>Current Poverty Specifications</u></b>                              |                       |              |
| <b>Specification A</b>                                                    |                       |              |
| Greater than 20.0%-Greater than 20.0% (Ref)                               |                       |              |
| 5.0%-19.99% - 5.0%-19.99%                                                 | 0.88                  | (0.67- 1.14) |
| Less than 5.0%-Less than 5.0%                                             | 0.76                  | (0.52- 1.11) |
| Upwardly Mobile                                                           | 0.77                  | (0.53- 1.13) |
| Downwardly Mobile                                                         | 1.21                  | (0.85- 1.71) |
| <b>Specification B</b>                                                    |                       |              |
| Greater than 40%-Greater than 40% (Ref)                                   |                       |              |
| 20.0%-39.99%-20.0%-39.99%                                                 | 0.57                  | (0.26- 1.26) |
| 13.8%-19.99% - 13.8%-19.99%                                               | 0.63                  | (0.28- 1.42) |
| Less than 13.8% - Less than 13.8%                                         | 0.48                  | (0.22- 1.06) |
| Upwardly Mobile                                                           | 0.64                  | (0.28- 1.44) |
| Downwardly Mobile                                                         | 0.61                  | (0.27- 1.37) |
| <b>Specification C</b>                                                    |                       |              |
| First (poorest) tertile-First tertile (Ref)                               |                       |              |
| Second tertile-Second tertile                                             | 0.86                  | (0.65- 1.12) |
| Third (wealthiest) tertile-Third tertile                                  | 0.86                  | (0.63- 1.18) |
| Upwardly Mobile                                                           | 0.82                  | (0.57- 1.17) |
| Downwardly Mobile                                                         | 1.13                  | (0.82- 1.55) |
| <b>Specification D</b>                                                    |                       |              |
| First (poorest) quartile-First quartile (Ref)                             |                       |              |
| Second quartile- Second quartile                                          | 0.92                  | (0.68- 1.12) |
| Third quartile-Third quartile                                             | 0.82                  | (0.59- 1.18) |
| Fourth (wealthiest) quartile-Fourth quartile                              | 0.80                  | (0.56- 1.55) |
| Upwardly Mobile                                                           | 0.86                  | (0.61- 1.21) |
| Downwardly Mobile                                                         | 1.23                  | (0.90- 1.17) |
| <b><u>Historical Poverty Specifications</u></b>                           |                       |              |
| <b>Three Class Neighborhood poverty History (Latent Trajectory Model)</b> |                       |              |
| High-High Poverty (Ref)                                                   |                       |              |
| Moderate-Moderate Poverty                                                 | 0.68                  | (0.47- 0.98) |
| Low-Low Poverty                                                           | 0.65                  | (0.45- 0.92) |
| Upwardly Mobile                                                           | 0.83                  | (0.54- 1.28) |

|                                                                           |      |        |       |
|---------------------------------------------------------------------------|------|--------|-------|
| Downwardly Mobile                                                         | 0.78 | (0.50- | 1.23) |
| <b>Eight Class Neighborhood poverty History (Cluster Model)</b>           |      |        |       |
| Very High Poverty-Very High Poverty                                       |      |        |       |
| High Poverty-High Poverty                                                 | 1.00 | (0.61- | 1.62) |
| Moderate Poverty Increasing-Moderate Poverty Increasing                   | 0.59 | (0.33- | 1.05) |
| Moderate Poverty Slightly Increasing-Moderate Poverty Slightly Increasing | 0.61 | (0.38- | 1.00) |
| Low Poverty, Increasing-Low Poverty, Increasing                           | 0.90 | (0.48- | 1.69) |
| Moderate Poverty-Moderate Poverty                                         | 0.71 | (0.43- | 1.14) |
| Low Poverty-Low Poverty                                                   | 0.52 | (0.32- | 0.86) |
| Very Low Poverty-Very Low Poverty                                         | 0.55 | (0.32- | 0.96) |
| Upwardly Mobile                                                           | 0.72 | (0.46- | 1.13) |
| Downwardly Mobile                                                         | 0.66 | (0.42- | 1.03) |

N = 2,720

---

*Sources:* Geographic Research on Wellbeing Study (GROW), 2012-2013, Maternal and Infant Health Assessment, 2003-2007, 1970-2000 Decennial Censuses, and the 2005-2009 American Community Survey.

Note: Missing data were handled by STATA's multiple imputation suite. Fully Adjusted Models.
